# Supplementary material
Source: publisher site journal article supplement (https://www.spandidos-publications.com/6063/downloadSupplementary)
Supplement: Supplementary file 1 [file downloadSupplementary]

Table S1. Genes differentially expressed in the present acute promyelocytic leukemia case versus the wild-type sample.

|                   |                   |                                                              |        |
|-------------------|-------------------|--------------------------------------------------------------|--------|
| TC1300006879.hg.1 | CCNA1             | Cyclin A1                                                    | 220.88 |
| TC1600011398.hg.1 | MMP2              | Matrix metalloproteinase 2                                   | 185.58 |
| TC0400009879.hg.1 | CYTL1             | Cytokine like 1                                              | 128.84 |
| TC0100014349.hg.1 | JUN               | Jun proto-oncogene                                           | 124.78 |
| TC1300008453.hg.1 | FLT3              | Fms-related tyrosine kinase 3                                | 120.32 |
| TC0300007484.hg.1 | STAB1             | Stabilin 1                                                   | 113.08 |
| TC1900009104.hg.1 | PRSS57            | Protease, serine, 57                                         | 104.09 |
| TC1100007684.hg.1 | SERPING1          | Serpin peptidase inhibitor, clade G (C1 inhibitor), member 1 | 92.51  |
| TC1000012454.hg.1 | ANXA8L1;<br>ANXA8 | Annexin A8-like 1; annexin A8                                | 88.69  |
| TC0X00008674.hg.1 | AFF2              | AF4/FMR2 family, member 2                                    | 85.86  |
| TC1600007723.hg.1 | GPT2              | Glutamic pyruvate transaminase (alanine aminotransferase) 2  | 78.81  |
| TC1200010839.hg.1 | ITGA5             | Integrin $\alpha$ 5                                          | 56.89  |
| TC1500007060.hg.1 | MAP1A             | Microtubule associated protein 1A                            | 46.07  |
| TC0100017083.hg.1 | RAB7B             | RAB7B, member RAS oncogene family                            | 40.81  |
| TC1900009112.hg.1 | PLPPR3            | Phospholipid phosphatase related 3                           | 40.61  |
| TC0200010745.hg.1 | IGFBP2            | Insulin like growth factor binding protein 2                 | 35.44  |
| TC0900008865.hg.1 | CERCAM            | Cerebral endothelial cell adhesion molecule                  | 32.42  |
| TC1800006493.hg.1 | EMILIN2           | Elastin microfibril interfacier 2                            | 25.71  |
| TC1900008597.hg.1 | CLEC11A           | C-type lectin domain family 11, member A                     | 22.37  |
| TC1300008371.hg.1 | CENPJ             | Centromere protein J                                         | 20.53  |
| TC0800008845.hg.1 | MYC               | V-myc avian myelocytomatosis viral oncogene homolog          | 20.02  |
| TC1200011845.hg.1 | SELPLG            | Selectin P ligand                                            | -51.53 |
| TC0100014857.hg.1 | GBP5              | Guanylate binding protein 5                                  | -55.18 |
| TC1200009881.hg.1 | CLEC2B            | C-type lectin domain family 2, member B                      | -55.46 |
| TC0700007034.hg.1 | CREB5             | cAMP responsive element binding protein 5                    | -59.00 |
| TC1200006779.hg.1 | CLEC12A           | C-type lectin domain family 12, member A                     | -59.77 |
| TC0600007377.hg.1 | HIST1H2BM         | Histone cluster 1, H2bm                                      | -63.58 |
| TC1600009683.hg.1 | IGSF6             | Immunoglobulin superfamily, member 6                         | -64.69 |
| TC0700008190.hg.1 | CD36              | CD36 molecule (thrombospondin receptor)                      | -66.28 |
| TC0400012921.hg.1 | TLR1              | Toll-like receptor 1                                         | -66.87 |
| TC0600011517.hg.1 | HLA-DPA1          | Major histocompatibility complex, class II, DP $\alpha$ 1    | -67.18 |
| TC1200011470.hg.1 | DUSP6             | Dual specificity phosphatase 6                               | -67.72 |

|                          |                            |                                                                                      |          |
|--------------------------|----------------------------|--------------------------------------------------------------------------------------|----------|
| <b>TC1400007890.hg.1</b> | GPR65                      | G protein-coupled receptor 65                                                        | -69.46   |
| <b>TC0200008663.hg.1</b> | IL1R2                      | Interleukin 1 receptor, type II                                                      | -72.40   |
| <b>TC0300012815.hg.1</b> | P2RY13                     | Purinergic receptor P2Y, G-protein coupled 13                                        | -98.16   |
| <b>TC0500007138.hg.1</b> | IL7R                       | Interleukin 7 receptor                                                               | -720.79  |
| <b>TC2000007514.hg.1</b> | MMP9                       | Matrix metalloproteinase 9                                                           | -728.02  |
| <b>TC1200009891.hg.1</b> | CLEC7A                     | C-type lectin domain family 7, member A                                              | -815.89  |
| <b>TC0800012382.hg.1</b> | DEFA3                      | Defensin $\alpha$ 3, neutrophil-specific                                             | -928.65  |
| <b>TC1100012471.hg.1</b> | AMICA1                     | Adhesion molecule, interacts with CXADR antigen 1                                    | -1048.50 |
| <b>TC0800012381.hg.1</b> | DEFA1;<br>DEFA1B           | Defensin $\alpha$ 1; defensin $\alpha$ 1B                                            | -1353.88 |
| <b>TC0800009437.hg.1</b> | DEFA1B;<br>DEFA1;<br>DEFA3 | Defensin $\alpha$ 1B; defensin $\alpha$ 1; defensin, $\alpha$ 3, neutrophil-specific | -1353.88 |
| <b>TC0400010961.hg.1</b> | JCHAIN                     | Joining chain of multimeric IgA and IgM                                              | -3059.05 |
| <b>TC1100012126.hg.1</b> | MMP8                       | Matrix metalloproteinase 8                                                           | -5080.06 |
| <b>TC1300007256.hg.1</b> | OLFM4                      | Olfactomedin 4                                                                       | -6188.65 |

---
